# Supplementary material for: Comparative analysis of metals, pesticides, mycotoxins, microbial contaminants and THC potency in illegal and regulated cannabis inflorescences in Canada
Source: J Cannabis Res. 2026 Feb 23;8:48. doi: 10.1186/s42238-026-00414-y (PMC13045130; doi:10.1186/s42238-026-00414-y)
Supplement: Supplementary file 1 — Supplementary Material 1. [file 42238_2026_414_MOESM1_ESM.xlsx]

## Sheet: Licenced
Supplementary Table 1: Licenced samples - metal data*
Sample ID	Ag	As	Au	Ba	Cd	Co	Cr	Cu	Hg	Li	Mo	Ni	Pb	Sb	Se	Sn	Tl	V
	[µg/g]	[µg/g]	[µg/g]	[µg/g]	[µg/g]	[µg/g]	[µg/g]	[µg/g]	[µg/g]	[µg/g]	[µg/g]	[µg/g]	[µg/g]	[µg/g]	[µg/g]	[µg/g]	[µg/g]	[µg/g]
LOD	0.07	0.02	0.01	3.00	0.03	0.03	0.03	0.3	0.01	0.25	0.10	0.05	0.05	0.20	1.30	0.60	0.08	0.01
Samples
1	<0.07	<0.02	<0.01	<3.00	<0.03	<0.03	0.09	6	<0.01	<0.25	6	0.08	<0.05	<0.20	<1.30	<0.60	<0.08	<0.01
2	<0.07	<0.02	<0.01	<3.00	<0.03	<0.03	0.04	8	<0.01	<0.25	2	<0.05	<0.05	<0.20	<1.30	<0.60	<0.08	<0.01
3	<0.07	<0.02	<0.01	<3.00	<0.03	<0.03	0.04	5	<0.01	<0.25	3	0.06	<0.05	<0.20	<1.30	<0.60	<0.08	0.01
4	<0.07	<0.02	<0.01	<3.00	<0.03	<0.03	<0.03	8	<0.01	<0.25	4	<0.05	<0.05	<0.20	<1.30	<0.60	<0.08	<0.01
5	<0.07	0.03	<0.01	4	0.08	<0.03	0.05	10	0.03	<0.25	2	0.2	<0.05	<0.20	<1.30	<0.60	<0.08	<0.01
6	<0.07	<0.02	<0.01	<3.00	<0.03	<0.03	0.2	7	<0.01	<0.25	2	0.6	<0.05	<0.20	<1.30	<0.60	<0.08	<0.01
7	<0.07	<0.02	<0.01	3	<0.03	<0.03	0.2	10	<0.01	<0.25	2	0.1	0.06	<0.20	<1.30	<0.60	<0.08	<0.01
8	<0.07	<0.02	<0.01	<3.00	<0.03	<0.03	0.07	7	<0.01	<0.25	4	0.1	<0.05	<0.20	<1.30	<0.60	<0.08	0.01
9	<0.07	<0.02	<0.01	<3.00	<0.03	<0.03	0.05	10	<0.01	<0.25	9	0.2	<0.05	<0.20	<1.30	<0.60	<0.08	<0.01
10	<0.07	<0.02	<0.01	<3.00	<0.03	<0.03	0.3	4	<0.01	<0.25	2	0.2	<0.05	<0.20	<1.30	<0.60	<0.08	<0.01
11	<0.07	<0.02	<0.01	6	<0.03	<0.03	<0.03	7	<0.01	<0.25	0.7	<0.05	<0.05	<0.20	<1.30	<0.60	<0.08	<0.01
12	<0.07	<0.02	<0.01	<3.00	<0.03	<0.03	0.1	10	<0.01	<0.25	2	0.1	<0.05	<0.20	<1.30	<0.60	<0.08	0.01
13	<0.07	<0.02	<0.01	<3.00	<0.03	<0.03	<0.03	10	<0.01	<0.25	3	0.04	<0.05	<0.20	<1.30	<0.60	<0.08	<0.01
14	<0.07	<0.02	<0.01	10	0.08	0.1	0.9	20	<0.01	<0.25	0.8	5	0.08	<0.20	<1.30	<0.60	<0.08	0.2
15	<0.07	<0.02	<0.01	<3.00	<0.03	<0.03	<0.03	10	<0.01	<0.25	4	<0.05	<0.05	<0.20	<1.30	<0.60	<0.08	<0.01
16	<0.07	<0.02	<0.01	4	<0.03	<0.03	<0.03	10	<0.01	<0.25	4	0.06	<0.05	<0.20	<1.30	<0.60	<0.08	0.01
17	<0.07	<0.02	<0.01	<3.00	<0.03	<0.03	<0.03	9	<0.01	<0.25	3	0.05	<0.05	<0.20	<1.30	<0.60	<0.08	<0.01
18	<0.07	0.04	<0.01	3	0.2	0.04	<0.03	6	<0.01	<0.25	0.6	0.09	<0.05	<0.20	<1.30	<0.60	<0.08	<0.01
19	<0.07	0.1	<0.01	5	0.05	0.05	0.09	6	<0.01	0.3	0.9	0.2	<0.05	<0.20	<1.30	<0.60	<0.08	<0.01
20	<0.07	<0.02	<0.01	<3.00	<0.03	<0.03	0.03	10	<0.01	<0.25	4	0.06	<0.05	<0.20	<1.30	<0.60	<0.08	<0.01
21	<0.07	0.03	<0.01	10	0.05	<0.03	0.04	10	<0.01	<0.25	1	0.09	<0.05	<0.20	<1.30	<0.60	<0.08	<0.01
22	<0.07	<0.02	<0.01	<3.00	<0.03	<0.03	0.08	8	<0.01	<0.25	4	0.2	<0.05	<0.20	<1.30	<0.60	<0.08	<0.01
23	<0.07	<0.02	<0.01	<3.00	<0.03	<0.03	0.08	5	<0.01	<0.25	2	0.05	<0.05	<0.20	<1.30	<0.60	<0.08	<0.01
24	<0.07	<0.02	<0.01	<3.00	<0.03	<0.03	<0.03	10	<0.01	<0.25	3	0.04	<0.05	<0.20	<1.30	<0.60	<0.08	0.02
25	<0.07	<0.02	<0.01	<3.00	<0.03	<0.03	<0.03	6	<0.01	<0.25	2	0.06	<0.05	<0.20	<1.30	<0.60	<0.08	<0.01
26	<0.07	<0.02	<0.01	10	<0.03	0.04	<0.03	5	<0.01	0.3	<0.10	0.07	<0.05	<0.20	<1.30	<0.60	<0.08	<0.01
27	<0.07	<0.02	<0.01	<3.00	<0.03	<0.03	<0.03	4	<0.01	<0.25	3	0.1	<0.05	<0.20	<1.30	<0.60	<0.08	<0.01
28	<0.07	<0.02	<0.01	<3.00	<0.03	<0.03	0.06	7	<0.01	<0.25	3	0.1	<0.05	<0.20	<1.30	<0.60	<0.08	<0.01
29	<0.07	<0.02	<0.01	<3.00	<0.03	<0.03	0.08	8	<0.01	<0.25	0.5	0.1	<0.05	<0.20	<1.30	<0.60	<0.08	<0.01
30	<0.07	<0.02	<0.01	40	<0.03	<0.03	<0.03	10	<0.01	<0.25	2	0.07	<0.05	<0.20	<1.30	<0.60	<0.08	0.01
31	<0.07	<0.02	<0.01	<3.00	<0.03	<0.03	0.1	9	<0.01	<0.25	5	0.1	<0.05	<0.20	<1.30	<0.60	<0.08	0.01
32	<0.07	<0.02	<0.01	<3.00	0.09	0.04	0.1	10	<0.01	<0.25	0.9	0.08	<0.05	<0.20	<1.30	<0.60	<0.08	<0.01
33	<0.07	<0.02	<0.01	<3.00	<0.03	<0.03	0.1	10	<0.01	<0.25	3	0.1	<0.05	<0.20	<1.30	<0.60	<0.08	0.01
34	<0.07	<0.02	<0.01	6	<0.03	<0.03	0.03	10	<0.01	<0.25	0.5	<0.05	<0.05	<0.20	<1.30	<0.60	<0.08	<0.01
35	<0.07	0.04	<0.01	<3.00	<0.03	<0.03	0.09	50	0.02	0.8	2	0.2	<0.05	<0.20	<1.30	<0.60	<0.08	<0.01
36	<0.07	<0.02	<0.01	<3.00	<0.03	<0.03	<0.03	6	<0.01	<0.25	10	0.07	<0.05	<0.20	<1.30	<0.60	<0.08	<0.01
37	<0.07	<0.02	<0.01	10	<0.03	<0.03	0.1	20	<0.01	<0.25	0.8	0.08	0.06	<0.20	<1.30	<0.60	<0.08	<0.01
38	<0.07	<0.02	<0.01	<3.00	<0.03	<0.03	<0.03	10	<0.01	<0.25	1	0.07	<0.05	<0.20	<1.30	<0.60	<0.08	<0.01
39	<0.07	<0.02	<0.01	6	<0.03	<0.03	0.04	9	<0.01	<0.25	1	0.1	<0.05	<0.20	<1.30	<0.60	<0.08	<0.01
40	<0.07	0.2	<0.01	4	0.06	<0.03	0.06	20	<0.01	<0.25	2	0.1	<0.05	<0.20	<1.30	<0.60	<0.08	<0.01
41	<0.07	<0.02	<0.01	<3.00	<0.03	<0.03	0.05	8	<0.01	<0.25	0.9	<0.05	<0.05	<0.20	<1.30	<0.60	<0.08	<0.01
42	<0.07	<0.02	<0.01	<3.00	<0.03	<0.03	0.06	7	<0.01	0.3	0.7	<0.05	<0.05	<0.20	<1.30	<0.60	<0.08	<0.01
43	<0.07	<0.02	<0.01	<3.00	<0.03	<0.03	0.09	4	<0.01	<0.25	2	<0.05	<0.05	<0.20	<1.30	<0.60	<0.08	<0.01
44	<0.07	<0.02	<0.01	<3.00	<0.03	<0.03	<0.03	4	<0.01	<0.25	3	<0.05	<0.05	<0.20	<1.30	<0.60	<0.08	<0.01
45	<0.07	0.04	<0.01	9	0.1	<0.03	0.04	7	0.01	<0.25	0.9	0.1	<0.05	<0.20	<1.30	<0.60	<0.08	0.01
46	<0.07	<0.02	<0.01	<3.00	<0.03	<0.03	0.04	8	<0.01	<0.25	7	0.2	<0.05	<0.20	<1.30	<0.60	<0.08	<0.01
47	<0.07	0.06	<0.01	4	0.06	0.09	0.3	60	<0.01	<0.25	2	0.3	0.2	<0.20	<1.30	<0.60	<0.08	0.4
48	<0.07	0.03	<0.01	<3.00	<0.03	<0.03	<0.03	8	<0.01	<0.25	0.1	0.07	<0.05	<0.20	<1.30	<0.60	<0.08	<0.01
49	<0.07	<0.02	<0.01	3	<0.03	0.05	0.05	20	<0.01	<0.25	4	0.5	<0.05	<0.20	<1.30	<0.60	<0.08	<0.01
50	<0.07	<0.02	<0.01	5	<0.03	<0.03	<0.03	10	<0.01	<0.25	1	<0.05	<0.05	<0.20	<1.30	<0.60	<0.08	<0.01
*Data values were rounded to one significant digit to preserve the anonymity of proprietary industry results.

## Sheet: Illicit
Supplementary Table 2: Illicit samples - metal data*
Metal	Ag	As	Au	Ba	Cd	Co	Cr	Cu	Hg	Li	Mo	Ni	Pb	Sb	Se	Sn	Tl	V
Concentration	[µg/g]	[µg/g]	[µg/g]	[µg/g]	[µg/g]	[µg/g]	[µg/g]	[µg/g]	[µg/g]	[µg/g]	[µg/g]	[µg/g]	[µg/g]	[µg/g]	[µg/g]	[µg/g]	[µg/g]	[µg/g]
LOD	0.07	0.02	0.01	3.00	0.03	0.03	0.03	0.3	0.01	0.25	0.10	0.05	0.05	0.20	1.30	0.60	0.08	0.01
Samples
51	<0.07	<0.02	<0.01	100	0.3	<0.03	0.07	4	<0.01	<0.25	2	<0.05	<0.05	<0.20	<1.30	<0.60	<0.08	<0.01
52	<0.07	<0.02	<0.01	<3.00	<0.03	<0.03	<0.03	10	<0.01	<0.25	0.9	0.08	<0.05	<0.20	<1.30	<0.60	<0.08	<0.01
53	<0.07	0.02	<0.01	<3.00	<0.03	<0.03	<0.03	8	0.02	<0.25	0.7	0.1	<0.05	<0.20	<1.30	<0.60	<0.08	<0.01
54	<0.07	0.02	<0.01	<3.00	<0.03	<0.03	0.03	9	0.02	<0.25	0.7	0.08	<0.05	<0.20	<1.30	<0.60	<0.08	<0.01
55	<0.07	<0.02	<0.01	<3.00	0.04	<0.03	<0.03	20	<0.01	<0.25	2	<0.05	<0.05	<0.20	<1.30	<0.60	<0.08	<0.01
56	<0.07	0.09	<0.01	3	0.1	<0.03	<0.03	10	<0.01	<0.25	0.3	0.09	<0.05	<0.20	<1.30	<0.60	<0.08	<0.01
57	<0.07	0.07	<0.01	6	0.03	0.05	0.06	9	<0.01	<0.25	0.2	0.3	<0.05	<0.20	<1.30	<0.60	<0.08	<0.01
58	<0.07	<0.02	<0.01	<3.00	<0.03	<0.03	<0.03	10	<0.01	<0.25	2	<0.05	<0.05	<0.20	<1.30	<0.60	<0.08	<0.01
59	<0.07	<0.02	<0.01	4	<0.03	<0.03	<0.03	10	<0.01	<0.25	0.7	<0.05	<0.05	<0.20	<1.30	<0.60	<0.08	<0.01
60	<0.07	<0.02	<0.01	6	<0.03	<0.03	0.04	6	<0.01	<0.25	1	0.06	<0.05	<0.20	<1.30	<0.60	<0.08	<0.01
61	<0.07	0.03	<0.01	<3.00	<0.03	<0.03	<0.03	7	<0.01	<0.25	0.5	0.05	<0.05	<0.20	<1.30	<0.60	<0.08	<0.01
62	<0.07	<0.02	<0.01	<3.00	<0.03	<0.03	0.2	8	<0.01	<0.25	0.6	0.07	<0.05	<0.20	<1.30	<0.60	<0.08	0.01
63	<0.07	0.06	<0.01	<3.00	0.03	<0.03	0.3	9	<0.01	<0.25	0.2	0.4	0.08	<0.20	<1.30	<0.60	<0.08	<0.01
64	<0.07	<0.02	<0.01	5	<0.03	<0.03	0.1	5	<0.01	<0.25	1	0.1	<0.05	<0.20	<1.30	<0.60	<0.08	<0.01
65	<0.07	0.05	<0.01	<3.00	0.09	<0.03	0.04	10	0.01	<0.25	0.9	0.1	0.1	<0.20	<1.30	<0.60	<0.08	<0.01
66	<0.07	0.3	<0.01	<3.00	<0.03	<0.03	0.05	10	<0.01	<0.25	0.6	0.1	<0.05	<0.20	<1.30	<0.60	<0.08	<0.01
67	<0.07	0.04	<0.01	8	<0.03	<0.03	0.2	10	<0.01	<0.25	0.9	0.2	0.3	<0.20	<1.30	<0.60	<0.08	0.1
68	<0.07	<0.02	<0.01	6	<0.03	<0.03	<0.03	5	<0.01	<0.25	0.9	<0.05	<0.05	<0.20	<1.30	<0.60	<0.08	<0.01
69	<0.07	<0.02	<0.01	<3.00	0.05	<0.03	0.1	10	<0.01	<0.25	0.5	0.09	0.2	<0.20	<1.30	<0.60	<0.08	<0.01
70	<0.07	<0.02	<0.01	7	0.04	<0.03	0.03	8	<0.01	<0.25	0.8	<0.05	<0.05	<0.20	<1.30	<0.60	<0.08	0.02
71	<0.07	<0.02	<0.01	<3.00	<0.03	<0.03	<0.03	8	<0.01	<0.25	0.5	<0.05	<0.05	<0.20	<1.30	<0.60	<0.08	<0.01
72	<0.07	0.05	<0.01	4	0.04	<0.03	0.05	6	<0.01	<0.25	0.4	0.08	<0.05	<0.20	<1.30	<0.60	<0.08	0.04
73	<0.07	0.04	<0.01	<3.00	0.03	<0.03	<0.03	5	<0.01	<0.25	0.1	0.07	<0.05	<0.20	<1.30	<0.60	<0.08	<0.01
74	<0.07	0.1	<0.01	4	0.06	<0.03	<0.03	7	<0.01	0.4	0.2	0.1	<0.05	<0.20	<1.30	<0.60	<0.08	<0.01
75	<0.07	<0.02	<0.01	<3.00	0.1	<0.03	<0.03	10	<0.01	0.8	0.3	0.06	<0.05	<0.20	<1.30	<0.60	<0.08	<0.01
76	<0.07	0.06	<0.01	<3.00	<0.03	<0.03	0.2	10	<0.01	<0.25	0.5	0.2	<0.05	<0.20	<1.30	<0.60	<0.08	<0.01
77	<0.07	<0.02	<0.01	8	<0.03	0.07	0.3	20	<0.01	<0.25	0.7	0.9	<0.05	<0.20	<1.30	<0.60	<0.08	0.2
78	<0.07	0.03	<0.01	<3.00	<0.03	<0.03	<0.03	9	<0.01	<0.25	0.7	0.09	<0.05	<0.20	<1.30	<0.60	<0.08	<0.01
79	<0.07	0.05	<0.01	<3.00	<0.03	<0.03	<0.03	4	<0.01	<0.25	0.8	0.06	<0.05	<0.20	<1.30	<0.60	<0.08	<0.01
80	<0.07	<0.02	<0.01	8	0.03	<0.03	0.09	10	<0.01	<0.25	0.9	0.2	0.1	<0.20	<1.30	<0.60	<0.08	0.1
81	<0.07	0.03	<0.01	6	0.04	<0.03	<0.03	8	<0.01	<0.25	0.7	0.07	<0.05	<0.20	<1.30	<0.60	<0.08	<0.01
82	<0.07	<0.02	<0.01	<3.00	<0.03	<0.03	<0.03	3	<0.01	<0.25	0.6	<0.05	<0.05	<0.20	<1.30	<0.60	<0.08	<0.01
83	<0.07	0.03	<0.01	<3.00	<0.03	<0.03	0.05	6	<0.01	<0.25	0.5	0.08	<0.05	<0.20	<1.30	<0.60	<0.08	0.03
84	<0.07	<0.02	<0.01	<3.00	<0.03	<0.03	<0.03	4	<0.01	<0.25	2	<0.05	<0.05	<0.20	<1.30	<0.60	<0.08	<0.01
85	<0.07	<0.02	<0.01	4	0.03	<0.03	<0.03	3	<0.01	<0.25	0.4	0.06	<0.05	<0.20	<1.30	<0.60	<0.08	<0.01
86	<0.07	0.05	<0.01	<3.00	0.04	<0.03	<0.03	9	<0.01	<0.25	0.2	0.09	0.08	<0.20	<1.30	<0.60	<0.08	0.02
87	<0.07	<0.02	<0.01	<3.00	<0.03	<0.03	<0.03	5	0.06	<0.25	0.4	0.06	<0.05	<0.20	<1.30	<0.60	<0.08	<0.01
88	<0.07	<0.02	<0.01	4	0.04	<0.03	0.06	10	<0.01	<0.25	1	0.1	<0.05	<0.20	<1.30	<0.60	<0.08	0.05
89	<0.07	0.2	<0.01	<3.00	0.05	0.03	0.06	8	<0.01	<0.25	0.2	0.2	0.1	<0.20	<1.30	<0.60	<0.08	0.02
90	<0.07	0.02	<0.01	<3.00	0.06	<0.03	0.03	6	<0.01	<0.25	0.4	0.07	0.09	<0.20	<1.30	<0.60	<0.08	<0.01
91	<0.07	<0.02	<0.01	<3.00	0.05	<0.03	<0.03	5	<0.01	0.5	0.8	0.07	0.07	<0.20	<1.30	<0.60	<0.08	<0.01
92	<0.07	<0.02	<0.01	<3.00	0.06	<0.03	<0.03	5	<0.01	0.8	0.7	0.09	0.07	<0.20	<1.30	<0.60	<0.08	<0.01
93	<0.07	<0.02	<0.01	<3.00	0.05	<0.03	0.05	4	<0.01	0.5	0.7	0.1	0.1	<0.20	<1.30	<0.60	<0.08	<0.01
94	<0.07	<0.02	<0.01	9	<0.03	<0.03	0.2	20	<0.01	<0.25	0.9	0.1	0.08	<0.20	<1.30	<0.60	<0.08	0.03
95	<0.07	<0.02	<0.01	<3.00	0.05	0.03	0.2	8	0.02	<0.25	0.3	0.1	0.1	<0.20	<1.30	0.9	<0.08	<0.01
96	<0.07	0.03	<0.01	10	0.2	<0.03	<0.03	6	0.02	2	2	0.3	0.3	<0.20	<1.30	<0.60	<0.08	<0.01
97	<0.07	<0.02	<0.01	<3.00	<0.03	<0.03	0.06	7	<0.01	<0.25	0.5	0.09	0.08	<0.20	<1.30	<0.60	<0.08	<0.01
98	<0.07	0.05	<0.01	<3.00	<0.03	<0.03	0.08	10	<0.01	<0.25	0.2	0.09	0.1	<0.20	<1.30	<0.60	<0.08	<0.01
99	<0.07	<0.02	<0.01	4	<0.03	<0.03	<0.03	6	<0.01	<0.25	0.8	<0.05	<0.05	<0.20	<1.30	<0.60	<0.08	<0.01
100	<0.07	<0.02	<0.01	<3.00	0.07	<0.03	<0.03	8	<0.01	<0.25	2	<0.05	<0.05	<0.20	<1.30	1	<0.08	<0.01
*Data values were rounded to one significant digit to preserve the anonymity of proprietary industry results.
